# Supplementary material
Source: ML conference proceedings conference paper supplement (https://proceedings.neurips.cc/paper_files/paper/2021/hash/602443a3d6907117d8b4a308844e963e-Abstract.html)
Supplement: Supplementary file 1 [file 602443a3d6907117d8b4a308844e963e-Supplemental.zip]

Archive with 20 entries (17 files):
- Submodular_Concave_Supplementary_Folder/
- Submodular_Concave_Supplementary_Folder/full_paper.pdf
- __MACOSX/
- __MACOSX/Submodular_Concave_Supplementary_Folder/
- __MACOSX/Submodular_Concave_Supplementary_Folder/._full_paper.pdf
- Submodular_Concave_Supplementary_Folder/jeopardy.py
- __MACOSX/Submodular_Concave_Supplementary_Folder/._jeopardy.py
- Submodular_Concave_Supplementary_Folder/.DS_Store
- __MACOSX/Submodular_Concave_Supplementary_Folder/._.DS_Store
- Submodular_Concave_Supplementary_Folder/questions.txt
- __MACOSX/Submodular_Concave_Supplementary_Folder/._questions.txt
- Submodular_Concave_Supplementary_Folder/experimental_design.py
- __MACOSX/Submodular_Concave_Supplementary_Folder/._experimental_design.py
- Submodular_Concave_Supplementary_Folder/quadraticprogramming.py
- __MACOSX/Submodular_Concave_Supplementary_Folder/._quadraticprogramming.py
- Submodular_Concave_Supplementary_Folder/interpolate.py
- __MACOSX/Submodular_Concave_Supplementary_Folder/._interpolate.py
- Submodular_Concave_Supplementary_Folder/README.txt
- __MACOSX/Submodular_Concave_Supplementary_Folder/._README.txt
- __MACOSX/._Submodular_Concave_Supplementary_Folder
