# Supplementary material
Source: ML conference proceedings conference paper supplement (https://proceedings.neurips.cc/paper_files/paper/2021/hash/602443a3d6907117d8b4a308844e963e-Abstract.html)
Supplement: Supplementary file 1 [file 602443a3d6907117d8b4a308844e963e-Supplemental.zip › Submodular_Concave_Supplementary_Folder/questions.txt]

For the last 8 years of his life, Galileo was under house arrest for espousing this man's theory
No. 2: 1912 Olympian; football star at Carlisle Indian School; 6 MLB seasons with the Reds, Giants & Braves
The city of Yuma in this state has a record average of 4,055 hours of sunshine each year
In 1963, live on "The Art Linkletter Show", this company served its billionth burger
Signer of the Dec. of Indep., framer of the Constitution of Mass., second President of the United States
In the title of an Aesop fable, this insect shared billing with a grasshopper
Built in 312 B.C. to link Rome & the South of Italy, it's still in use today
No. 8: 30 steals for the Birmingham Barons; 2,306 steals for the Bulls
In the winter of 1971-72, a record 1,122 inches of snow fell at Rainier Paradise Ranger Station in this state
This housewares store was named for the packaging its merchandise came in & was first displayed on
"And away we go"
Cows regurgitate this from the first stomach to the mouth & chew it again
In 1000 Rajaraja I of the Cholas battled to take this Indian Ocean island now known for its tea
No. 1: Lettered in hoops, football & lacrosse at Syracuse & if you think he couldn't act, ask his 11 "unclean" buddies
On June 28, 1994 the nat'l weather service began issuing this index that rates the intensity of the sun's radiation
This company's Accutron watch, introduced in 1960, had a guarantee of accuracy to within one minute a  month
Outlaw: "Murdered by a traitor and a coward whose name is not worthy to appear here"
A small demon, or a mischievous child (who might be a little demon!)
Karl led the first of these Marxist organizational efforts; the second one began in 1889
No. 10: FB/LB for Columbia U. in the 1920s; MVP for the Yankees in '27 & '36; "Gibraltar in Cleats"
Africa's lowest temperature was 11 degrees below zero in 1935 at Ifrane, just south of Fez in this country
Edward Teller & this man partnered in 1898 to sell high fashions to women
1939 Oscar winner: "...you are a credit to your craft, your race and to your family"
In geologic time one of these, shorter than an eon, is divided into periods & subdivided into epochs
This Asian political party was founded in 1885 with "Indian National" as part of its name
No. 5: Only center to lead the NBA in assists; track scholarship to Kansas U.; marathoner; volleyballer
The Kirschner brothers, Don & Bill, named this ski company for themselves & the second-highest mountain
Revolutionary War hero: "His spirit is in Vermont now"
A single layer of paper, or to perform one's craft diligently
<a href="http://www.j-archive.com/media/2004-12-31_DJ_23.mp3">Beyond ovoid abandonment, beyond ovoid betrayal... you won't believe the ending when he "Hatches the Egg"</a>
California
It can be a place to leave your puppy when you take a trip, or a carrier for him that fits under an airplane seat
He's considered the author of the Pentateuch, which is hard to believe, as Deuteronomy continues after his death
Steven Tyler of this band lent his steamin' vocals to "Train Kept A-Rollin'", first popularized by the Yardbirds
Around 100 A.D. Tacitus wrote a book on how this art of persuasive speaking had declined since Cicero
1 of the 2 born in Vermont
When it began on Pan Am & Qantas in the late '70s, it was basically a roped-off part of the economy cabin with free drinks
Ali, who married this man's daughter Fatima, is considered by Shia Muslims to be his true successor
During the 1954-1955 Sun sessions, Elvis climbed aboard this train "sixteen coaches long"
The shorter glass seen <a href="http://www.j-archive.com/media/2004-12-31_DJ_12.jpg" target="_blank">here</a>, or a quaint cocktail made with sugar & bitters
<a href="http://www.j-archive.com/media/2004-12-31_DJ_26.mp3">Ripped from today's headlines, he was a turtle king gone mad; Mack was the one good turtle who'd bring him down</a>
In 2003 this airline agreed to buy KLM, creating Europe's largest airline
Philadelphia got its start as a colony for this religious group of which William Penn was a member
This "Modern Girl" first hit the Billboard Top 10 with "Morning Train (Nine To Five)"
This stiff silken fabric is favored for bridal gowns, like Christina Applegate's in 2001
<a href="http://www.j-archive.com/media/2004-12-31_DJ_25.mp3">Somewhere between truth & fiction lies Marco's reality... on Halloween, you won't believe you saw it on this St.</a>
In 2004 United launched this new service that features low fares & more seats per plane
With Mary I's accession in 1553 he ran to Geneva; he returned in 1559 & reformed the Church of Scotland
This band's "Train In Vain" was a hidden track on its original 1979 "London Calling" album
Cross-country skiing is sometimes referred to by these 2 letters, the same ones used to denote 90 in Roman numerals
<a href="http://www.j-archive.com/media/2004-12-31_DJ_24.mp3">"500 Hats"... 500 ways to die.  On July 4th, this young boy will defy a king... & become a legend</a>
In the seat pocket you'll find the catalog called "Sky" this, with must-haves like a solar-powered patio umbrella
In 1534 he & his buddy Francis Xavier founded the Society of Jesus
In 1961 James Brown announced "all aboard" for this train
This 1797 imbroglio began when 3 French agents demanded a huge bribe from U.S. diplomats
Objects that pass closer to the sun than Mercury have been named for this mythological figure
It's the largest kingdom in the United Kingdom
"Party In The U.S.A." is by this singer who also plays a young lady named Hannah
If this part of a peach is downy or fuzzy, the fruit's called a peach; if it's smooth, a nectarine
4 x 12
This verb for bouncing a basketball sounds like you're slobbering
Blood pumper
(<a href="http://www.j-archive.com/media/2010-07-06_J_22.wmv">Tate: I'm Tate Shaffer aboard the <i>National Geographic Endeavour</i>.  Alex: And...</a>)  We're here in the Galapagos Islands at zero degrees latitude, which means we're right above this imaginary line that goes all the way around the Earth
"Everybody Else" knows these huggable toys precede "On Fire" in the name of a Radio Disney top 30 band; do you?
Peaches are more than 80% this compound
7 x 7 x 2
Sound navigation& ranging is the full name for this device that bounces radio waves underwater
Small, slender missile thrown at a board in a game
This island in the South Pacific is named for the day of its discovery, a religious holiday
"The songs on 'Under My Skin' are...deeper than those on 'Let Go'" said this Canadian on Radio Disney's website
5-letter word for the hard interior of a peach
3 x 4 x 5 x 6
In this kid's game, you bounce a small rubber ball while picking up 6-pronged metal objects
It can be a separating line in your hair or a role in a play
Parts of the Arabian and Libyan deserts are found in this African country
"I Never Told You" this alliteratively named singer hit Disney's Top 30 with "Fallin' For You"; wait, I just did
These parts of a peach tree are glossy green, pointed & lance shaped
5 x 10 x 15
It's a type of bounce house, or a dance made famous by Michael Jackson
A graphic representation of information
The family history you wrote for school might include entering the U.S. at this island in New York Bay
Lead singer Ryan Tedder of this band has "All The Right Moves"
These parts of a peach tree grow at nodes along the shoots of the previous season's growth; they're usually pink
2 x 1,035
This device whose name is from the Italian for "springboard" was perfected in the 1930s
Composer Wolfgang
99.95% of the mass of an atom is in this part
Park View of Chula Vista, California beat Taipei 6-3 to win this organization's 2009 World Series
This hero of several books is 11 when he discovers he's a wizard
Say the name of <a href="http://www.j-archive.com/media/2010-07-06_DJ_26.jpg" target="_blank">this</a> type of mollusk you see
A 7.0 magnitude earthquake in this Caribbean country Jan. 12, 2010 brought a world outpouring of aid
It's the 4-letter name of the pleated skirt worn by men in Scotland
During this plant process, carbon dioxide & water combine with light energy to create oxygen & glucose
The perfect waves of New Zealand's Piha Beach were the site for the 2010 World Junior Championships of this
This city, the seat of Clark County, Nevada, has been called "the entertainment capital of the world"
Say <a href="http://www.j-archive.com/media/2010-07-06_DJ_27.jpg" target="_blank">this</a> state that was admitted to the Union in 1859
This car company has been in the news for widespread recalls of its Corollas & other models
As an adjective, it can mean proper; as a verb, "to grade papers"
The wedge is an adaptation of the simple machine called the inclined this
With a mighty leap of 5'1", David Mosely set the U.S. 10 & under record in this event back in 1977
<a href="http://www.j-archive.com/media/2010-07-06_DJ_14.jpg" target="_blank">This dog breed seen here</a> is a loyal and protective companion
Say the name of <a href="http://www.j-archive.com/media/2010-07-06_DJ_28.jpg" target="_blank">this</a> bug; don't worry, it doesn't breathe fire
(<a href="http://www.j-archive.com/media/2010-07-06_DJ_21.wmv">Jimmy of the Clue Crew demonstrates, putting his arm over his mouth.</a>) To avoid spreading germs & maybe flu, we learned the sneeze named for this character made famous in an 1897 book
Maize is another word for this
Of the 6 noble gases on the periodic table, it is the lightest
11-year-old Ashlyn White won a 2009 U.S. youth title in this martial art in which you try to throw your opponent
In 1751 the Penn Provincial Assembly placed the order for this symbol of freedom, now in Philadelphia
Say the name of <a href="http://www.j-archive.com/media/2010-07-06_DJ_29.jpg" target="_blank">these</a> big trees; it has a color in it
In a surprise, Ted Kennedy's old Senate seat in this state went to a Republican in a January 2010 election
This word for someone who walks comes from the Latin for "foot"
Lava & igneous rock are formed from this hot liquid rock material found under the earth's crust
This sport has an under-17 World Cup every 2 years; Haris Seferovic starred for the 2009 champion Switzerland
He's the older son of Prince Charles and the late Princess Diana
Say the name of <a href="http://www.j-archive.com/media/2010-07-06_DJ_30.jpg" target="_blank">this</a> man you see shaking hands with the Premier of China
Falcon Heene, who it turned out was safe at home, not flying over Colorado, became known as this "boy"
Kayak is an example of this, a word that reads the same forwards & backwards
She was born in Virginia around 1596 & died in Kent, England in 1617
Prime Minister Tony Blair dubbed her "The People's Princess"
Once Tommy Mullaney on "L.A. Law", John Spencer now plays White House chief of staff Leo McGarry on this series
The Cinderella Castle Mystery Tour is a highlight of this Asian city's Disneyland
This punk rock hitmaker heard here has had numerous hits on both sides of the Atlantic
"Conrad begins (and ends) Marlow's journey... on the Thames, on the yawl, Nellie", says the foreword to this novel
We'll look smart in these vehicles that returned to London in 1999
She was "The Untamed Heifer" & "The Virgin Queen"
Barbra Streisand knows he played Lt. Col. Bill "Raider" Kelly on "Pensacola: Wings of Gold"
The home of silk merchant Jim Thompson, who disappeared in 1967, is a tourist attraction in this Thai city
Czar at 17, he was famous for extraordinary sadism & cruelty, even as a boy
Part 2 "is Lilliput in reverse, but...also offers some of" his "fiercest assaults upon the behavior of" his countrymen
Ed leaves pools of water on the carpet when he comes in from sailing this boat
Mark Antony called her "The Queen of Queens"
(Hi, I'm Wallace Langham)  I played Don Kirshner in VH1's TV movie about this quartet who sang "Daydream Believer"
We're not stringing you along: this capital of the Czech Republic is famous for its puppet theatres
Nudge, nudge, wink, wink!  This man seen here starred on a classic British comedy show
She said that her husband Frank O'Connor was the fuel that kept her spirited while she wrote "The Fountainhead"
You'd be naive to think you can make bottled water that's more popular than this
The 19th century's "Widow of Windsor"
Teri Hatcher looked "shipshape" as one of the singing "mermaids" who jumped on board this cruisin' series in 1985
Jomo Kenyatta International Airport serves this world capital
His is the first & longest book of the Bible's major prophets
One edition calls this Darwin opus one of "the most readable and approachable" of revolutionary scientific works
Aye, lass, I'll wed thee ere this has dried on the fields
"The Catholic" of 15th century Spain
On "Saturday Night Live", he's famous for playing Craig the Cheerleader, Janet Reno & moi
Andrea Palladio's 1554 book on "The Antiquities of" this city was the standard guidebook for some 200 years
This auto exec's autobiography is one of the bestselling nonfiction works in publishing history
You know so much about policy, you qualify as this
After a 15-year stay in England, this proprietor of Pennsylvania returned to his colony in 1699
SFX is the standard abbreviation for these, from the rustling of trees to cannon fire
Saint-Pierre & Miquelon
Designer Vivienne Westwood ran a shop with Malcolm McLaren, who launched this Johnny Rotten band
Because he had the same thing for lunch every day for 20 years, Andy Warhol painted these, beginning in 1962
Lerner & Loewe's "Lusty Month" (3)
This young man put his savings into a small Cleveland refinery in 1862 & eventually had an oil monopoly
Term for the flow of a film, maintained by keeping details consistent throughout a scene
Montserrat
Star designer John Galliano was born Juan Carlos Galliano in this British possession at the tip of Spain
Warhol went against his Capitalist tendencies with his portrait of this man, seen here
Patrick Dennis' "Auntie" (4)
First Lady Helen Taft led a fund-raising drive for a memorial to this 1912 marine disaster
Garland Jeffreys sang of having star-studded "dreams" of this size, like movie film
Cook Islands
Katharine Hamnett created the '80s T-shirt telling us to "choose" this
Andy's "15 minutes of fame" quote was once the motto of this magazine
It "Becomes Electra" (8)
This Chiricahua Apache was a popular attraction at the 1904 World's Fair in St. Louis
The inventors of this camera-stabilizing device won a special 1977 Oscar
Madeira Islands
Andy's loft on East 47th Street got this nickname from its former use & Andy's mass-production techniques
Colchian jilted by Jason (5)
In 1801 this onetime VP compiled "A Manual of Parliamentary Practice" still used in the U.S. Senate
Near the end of the credits comes the "cutter" of this, the exposed but unfinished film
Northern Mariana Islands
Warhol became the manager of this Lou Reed rock group in 1965 & produced their first album
Faust's fiendish foe (14)
If Joe DiMaggio's hitting streak had gone one more game in 1941, this company would have given him a $10,000 contract
This white, glossy coating on your teeth is the hardest substance in the human body
This bovine took the rap for the disastrous fire of October 8, 1871
It's the kingdom whose flag is seen here (Union Jack)
Minoru Yamasaki reached new heights with this New York City complex
Quentin Tarantino directed this film & also had a bit role as Jimmy of Toluca Lake
A student, or a minor in Roman law
The time it takes for 50% of the atoms to decay in a radioactive substance is called this
At 14,140 feet, this Rocky Mountain peak discovered in 1806 is one of Colorado's highest
Seen here is the flag of this nation (the home of Bollywood)
William Pereira erected his Transamerica "Pyramid" in this city
As mad bomber Howard Payne in this film, Dennis Hopper planted a bomb on an L.A. area transit bus
A blow with a whip
While compounds of this element are added to table salt, in its pure form it's quite poisonous
While one creation slept, God took this to make Eve
Andy Garcia is a native of this country whose flag is seen here
Charles Bulfinch, who contributed to the Capitol in Washington, D.C., designed this city's state house on Beacon Hill
Jean Vander Pyl, who played Wilma in the original cartoon series, played Mrs. Feldspar in this movie adaptation
A hollow area that holds a light bulb
The "super" class of these stars, the largest known, includes Antares & Betelgeuse
You'll find this triangular island about 4 miles off the southeast coast of Massachusetts
In the 1990s, this nation whose flag is seen here moved its seat of government to a different city
Dallas-Fort Worth Airport architect Gyo Obata helped design this Smithsonian museum
Containing the hit "Can You Feel The Love Tonight", it was Disney's first animated feature not based on an existing story
Flower seen here (that fits the category)
On the pH scale, a pH of 7 indicates this type of solution
In Exodus, this was thrown down before Pharaoh at Moses' instruction
This Mediterranean country whose flag is seen here is "The Word"
Louis Skidmore designed the secret atomic site that became this Tennessee town
In this film Martin Scorsese says the TV audience wants "To  watch the money"
People say these are what you need to make it in Hollywood
4 different species of bears live in Alaska:  Kodiak, grizzly, black & this
Nike's stock fell when this basketball player announced his retirement in January 1999
In Euripides' play about this famed beauty, it's her double who goes to Troy
In 1996 John Travolta spread his wings as this archangel
Porfirio Diaz seized power in this country in 1876, ruled for 35 years, fled in 1911 & died in exile
This term for a fluid can also mean "to sign" as a contract
Tony Knowles is pulling in $81,648 per annum in this job
Ronaldo Luiz Nazario de Lima began playing this sport for Brazil's national team at age 17
In a Shaw play, Caesar finds her hiding on a Sphinx
In Book III of "Paradise Lost", the angels play these, which are "golden" & "ever-tuned"
In 1462 this printer known for movable type had to move out of Mainz
Style of the 1877 painting seen here
This second-largest Alaskan city wasn't named for an actor
Vladimir Samsonov is touted as Europe's only hope against China in this game
A 1952 play covered the young life of this queen, like a 1998 Cate Blanchett film
ABBA sang about these & Curtis Lee sang about "Pretty Little" these
Exiled for manslaughter, Eric the Red was forced to leave this country around 981
Arabic for "son of", it comes before names like Saud
One of the 3 mottos that have been featured on regular Alaskan license plates
The Times of London estimates this chess player is taking home $20 mil. a year; that's some check, mate!
In 1935 & '36 Helen Hayes reigned for 517 Broadway performances as this queen who reigned for 63 years
Group whose feast day is October 2, or a group founded in 1979 by Curtis Sliwa
David Ben-Gurion went to the U.S. in 1915 when this empire exiled Zionists from Palestine
From the Latin for "to overhang", it means "likely to happen at any moment"
The mainland peninsula closest to Russia is named for this man
New Zealand-born Jonah Lamu is tops on the pitch of this sport
The queen in Marlowe's "Edward II" is named this, like a famous queen of Spain
With an appropriate-sounding name, John Dye plays the angel of this on "Touched By An Angel"
Moshoeshoe II was exiled twice before regaining this southern African country's throne in 1995
Some scientists believe that the universe is undergoing expansion called this, also an economic term
Bordering Italy, Austria, Hungary & Croatia, it's one of the world's newest independent countries
His first act after being sworn in as president of the Confederacy was to send a peace commission to Washington, D.C.
On Sept. 14, 2005 she gave birth to Sean Preston Federline
Yeah, baby!  Meaning "magnificent", this Texas-sounding name comes with certain "Powers"
;-) Ocular act that sends a signal
The Alamo is located in this city & is depicted on its flag
Numerically speaking, read up on "Fun Stuff", "Fashion", "Health" & "Stars" at this magazine.com
Tired of eating mule jerky, Vicksburg fell in July 1863 after a 6-week one of these military tactics
The TV show "Everybody Hates Chris" is based on the childhood of this comic
This name shared by great & terrible rulers is a Russian variation of John
:-$ It's where this emoticon tells you to "put your money"
This descriptive nickname of the U.S. flag was coined by Francis Scott Key
If you're triskaidekaphobic, you're afraid of this number, & not just on a Friday
Robert E. Lee saved this capital from capture with his June 1862 attack on McClellan's forces
He auditioned for & won the part of Ron Weasley with a rap that he wrote
This feminine form of Rex is from the Latin for "queen"
:-* Gene Simmons might accept one of these from any pretty woman
The 2 colors found on all 3 national flags of the U.S., Mexico & Canada
A holder for liquid, or a military base's general store
In Feb. 2005 a reenactment was staged for this 140th anniversary of this fort's reoccupation by Union troops
Her 18th birthday party was "A Cinderella Story" with 300 guests & red velvet cake
This Welsh form of Margaret was among the USA's top 10 girls' names of the 1990s
=|:-)= This is an extension of the initials U.S.
The <a href="http://www.j-archive.com/media/2006-02-06_J_29.jpg" target="_blank">flag</a> of this U.S. possession is almost the same as the flag of Cuba
Golfing "hole" with a bar (where you can't go), or the amendment granting women's suffrage
On Sept. 2, 1864 this general sent a wire saying, "Atlanta is ours, and fairly won"
"You Stand Watching" this "Shine On" singer
Previously attached to Theo- & Isa-, it became popular by itself after appearing in "David Copperfield"
:-b.. Doing this means either you're hungry or you're a pig
The first 50-star U.S. flag was officially raised on July 4 of this year
Number of lines in Shakespeare's poem that starts "Shall I compare thee to a summer's day?"
Ljubljana, Bratislava, Barcelona
Mike Eruzione of Winthrop, Mass. was captain of the miraculous 1980 Olympic team in this sport
At sea level at 70 degrees this travels 1,129 feet per second; it speeds up over 1 foot per sec. for each rising degree
"I beheld the wretch--the miserable monster whom I had created"
Found "just what I needed" at this "City", an electronics store
The name of this color comes from the Greek word porphyra
Istanbul, Ottawa, Amman
(<a href="http://www.j-archive.com/media/2006-02-06_DJ_23.jpg" target="_blank">Jimmy of the Clue Crew puts some lines on the ice in the Olympic Oval rink at Park City, UT.</a>)  In 1998, <a href="http://www.j-archive.com/media/2006-02-06_DJ_23a.jpg" target="_blank">this U.S. skater</a> was 2nd at Nagano; in 2002, she was 3rd here in Utah
The largest tree, the General Sherman in California, is this type, also called a Sierra Redwood
"Take thy beak from out my heart, and take thy form from off my door!"
SKX is the stock symbol for this manufacturer of sporty shoes
A bowl-shaped depression, as from the impact of a meteorite, it's from the Greek for "mixing bowl"
Sofia, Sarajevo, Saigon
Life has its ups & downs for Travis Mayer, a 2002 medalist in the event named for these little hills on the slopes
(<a href="http://www.j-archive.com/media/2006-02-06_DJ_13.jpg" target="_blank">Sarah of the Clue Crew reads from the pole vault at Duke University's track in Durham, NC.</a>)  In bending an elastic solid, stress is the force causing deformation & this is the 6-letter term for <a href="http://www.j-archive.com/media/2006-02-06_DJ_13a.jpg" target="_blank">the deformation</a>
"'Do all lawyers defend n-negroes, Atticus?'  'Of course they do, Scout'"
This "Urban" store is the parent company of Anthropologie
From the Greek for "false name", it's a fictitious name used by an author
Bucharest, Bonn, Bern
In 2002 Vonetta Flowers & Jill Bakken won gold in the 2-woman version of this high-speed sport
6 elements once known as inert gases are now known by this aristocratic name
"For never man had a more faithful, loving, sincere servant, than Friday was to me"
This bookstore chain is named for its "edgy" founders, brothers Tom & Louis
(<a href="http://www.j-archive.com/media/2006-02-06_DJ_04.jpg" target="_blank">Jon of the Clue Crew paddles his kayak.</a>)  Kayak is an example of this type of reversible word from the Greek for "running back again"
Belize City, Guatemala City, Panama City
His "Bode" of work includes 2 Alpine skiing silver medals in 2002
(<a href="http://www.j-archive.com/media/2006-02-06_DJ_15.wmv">A honey-colored retriever named Max tries to lick Cheryl of the Clue Crew as she pets him at NC State University in Raleigh, NC.</a>)  Veterinarians refer to this area of an animal's body as the posterior or this region, from the Latin for "the tail"
"'...Why look'st thou so?'--'With my crossbow I shot the albatross'"
The name of this clothing store for teens is French for "airmail"
It's an outline of the contents of a course or curriculum
On December 27, 1831 it departed Plymouth, England to map the coastline of South America
goop.com is a lifestyles website from this Oscar-winning actress; the g & p represent her initials
On March 19, 2009 he said, "I'm excited and honored to introduce my first guest... Barack Obama"
Baylor, Stephen F. Austin, Rice
Synonym for dignity that's the term for a group of lions
If you're a beginner, you might hippity-hop over to this smaller, gentler slope
If your mate from Marseilles says he's getting to LAX via "Sud-Ouest", pick him up at this carrier
In 2008 David Gregory became moderator of this NBC Sunday morning news show
Time magazine said this 2003 Pixar film was "the ultimate fish-out-of-water story"
Antioch, Bowling Green, Kent State
Like peas, whales & seals are in groups called these
Something you'd sprinkle on after a shower, it's also the term for soft, dry, freshly fallen snow
Duck, duck, l'oie; (l'oie of course referring to this other feathered friend)
Linus Torvalds is the father of this operating system used on cell phones & supercomputers
Of his dialogue, this Han Solo actor said, "You can type this (stuff), George, but you sure can't say it"
DePaul, Wheaton, Northwestern
A crash is a group of these large horned mammals
In California, a premier spot for skiing is this resort area that shares its name with a prehistoric elephant
"Je ne sais pas" means this, but you still get credit if you phrase it in the form of a question
The district of conservative rep. Patrick McHenry in this state includes Mooresville, a home of NASCAR
Tim Robbins played a public TV newsman in "Anchorman: The Legend of" him
Wayne State, Kalamazoo College, Madonna University (it's Franciscan Catholic, not Material Girl)
It can be a pack of dogs, or a place to board them
In this type of race you have to zigzag between flags or other obstacles in proper order
When mom tells you to do something "Maintenant!", she means this
Elon Musk is now making rockets & electric cars; before that he co-founded & sold this electronic payment system
We were frakkin' sad when this sci fi show had its series finale on March 20, 2009
Grambling, McNeese State, Southern
